# Supplementary material for: Novel applications of fluorescent brighteners in aqueous visible-light photopolymerization: high performance water-based coating and LED-assisted hydrogel synthesis
Source: Royal Society of Chemistry journal article supplement (doi:10.1039/c8py00584b), 2018-01-01
Supplement: c8py00584b1.pdf [file c8py00584b1.pdf]

## Supporting Information

### Novel applications of fluorescent brighteners in aqueous visible-light photopolymerizations: high performance water- based coating and LED-assisted hydrogel synthesis

Xiaoling Zuo <sup>1,2,3</sup>, Fabrice Morlet-Savary <sup>1,2</sup>, M. Schmitt<sup>1,2</sup>, Didier Le Nouën <sup>3</sup>, Nicolas Blanchard <sup>3\*</sup>,  
Jean-Philippe Goddard <sup>3\*</sup>, Jacques Lalevée <sup>1,2\*</sup>

<sup>1</sup>Université de Haute-Alsace, CNRS, IS2M UMR 7361, F-68100 Mulhouse, France

<sup>2</sup>Université de Strasbourg, France

<sup>3</sup> Université de Haute-Alsace, Université de Strasbourg, CNRS, LIMA, UMR 7042, 68000  
Mulhouse, France

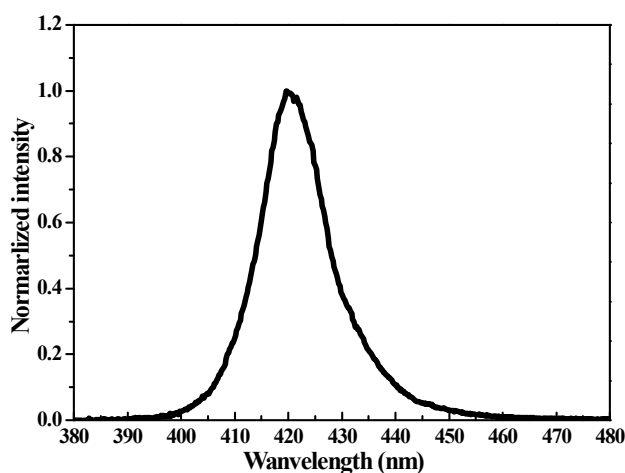

**Figure S1** Emission spectrum of the irradiation source LED@420 nm (M420-L3, Thorlabs,  $\sim 40 \text{ mW cm}^{-2}$ ).

**Table S1** Photopolymerization data of the Ebecryl 605/water blends with different water concentration obtained under air and exposure to LED@420 nm in the presence of various brighteners-based PISs.

| PISs                         | Ebecryl 605<br>(100 wt%) |                           | Ebecryl 605/water<br>(90%/10%, w/w) |                           | Ebecryl 605/water<br>(80%/20%, w/w) |                           | Ebecryl 605/water<br>(70%/30%, w/w) |                           |
|------------------------------|--------------------------|---------------------------|-------------------------------------|---------------------------|-------------------------------------|---------------------------|-------------------------------------|---------------------------|
|                              | FC (%)                   | PR( $R_p/[M_0]^*$<br>100) | FC (%)                              | PR( $R_p/[M_0]^*$<br>100) | FC (%)                              | PR( $R_p/[M_0]^*$<br>100) | FC (%)                              | PR( $R_p/[M_0]^*$<br>100) |
| TFB/IOD<br>(0.5%/1%, w/w)    | 47.3 ±<br>1.2%           | 0.74 ± 0.1                | 58.7 ±<br>1.8%                      | 1.74 ± 0.2                | 61.5 ±<br>2.0%                      | 4.26 ± 0.05               | 43.1 ±<br>2.1%                      | 0.67 ± 0.2                |
| C1/IOD<br>(0.1%/1%, w/w)     | 40.9 ±<br>2.2%           | 0.54 ± 0.2                | 42.2 ±<br>2.8%                      | 0.84 ± 0.07               | 50.2 ±<br>1.7%                      | 0.60 ± 0.1                | 42.1 ±<br>1.9%                      | 0.65 ± 0.1                |
| CBUS 450/IOD<br>(2%/2%, w/w) | 30.2 ±<br>1.9%           | 0.52 ± 0.1                | 63.1 ±<br>2.1%                      | 1.45 ± 0.08               | 52.9 ±<br>1.5%                      | 1.41 ± 0.2                | 49.8 ±<br>0.7%                      | 1.24 ± 0.2                |
| CBS X/IOD<br>(0.1%/1%, w/w)  | 38.5 ±<br>2.9%           | 1.13 ± 0.06               | 45.4 ±<br>2.6%                      | 1.10 ± 0.15               | 50.6 ±<br>1.9%                      | 1.68 ± 0.2                | 45.2 ±<br>1.3%                      | 1.16 ± 0.13               |
| BBT/IOD<br>(1%/2%, w/w)      | 37.1 ±<br>1.8%           | 0.59 ± 0.3                | 49.4 ±<br>2.7%                      | 0.84 ± 0.1                | 42.1 ±<br>2.2%                      | 0.68 ± 0.3                | 39.1 ±<br>1.5%                      | 0.53 ± 0.3                |

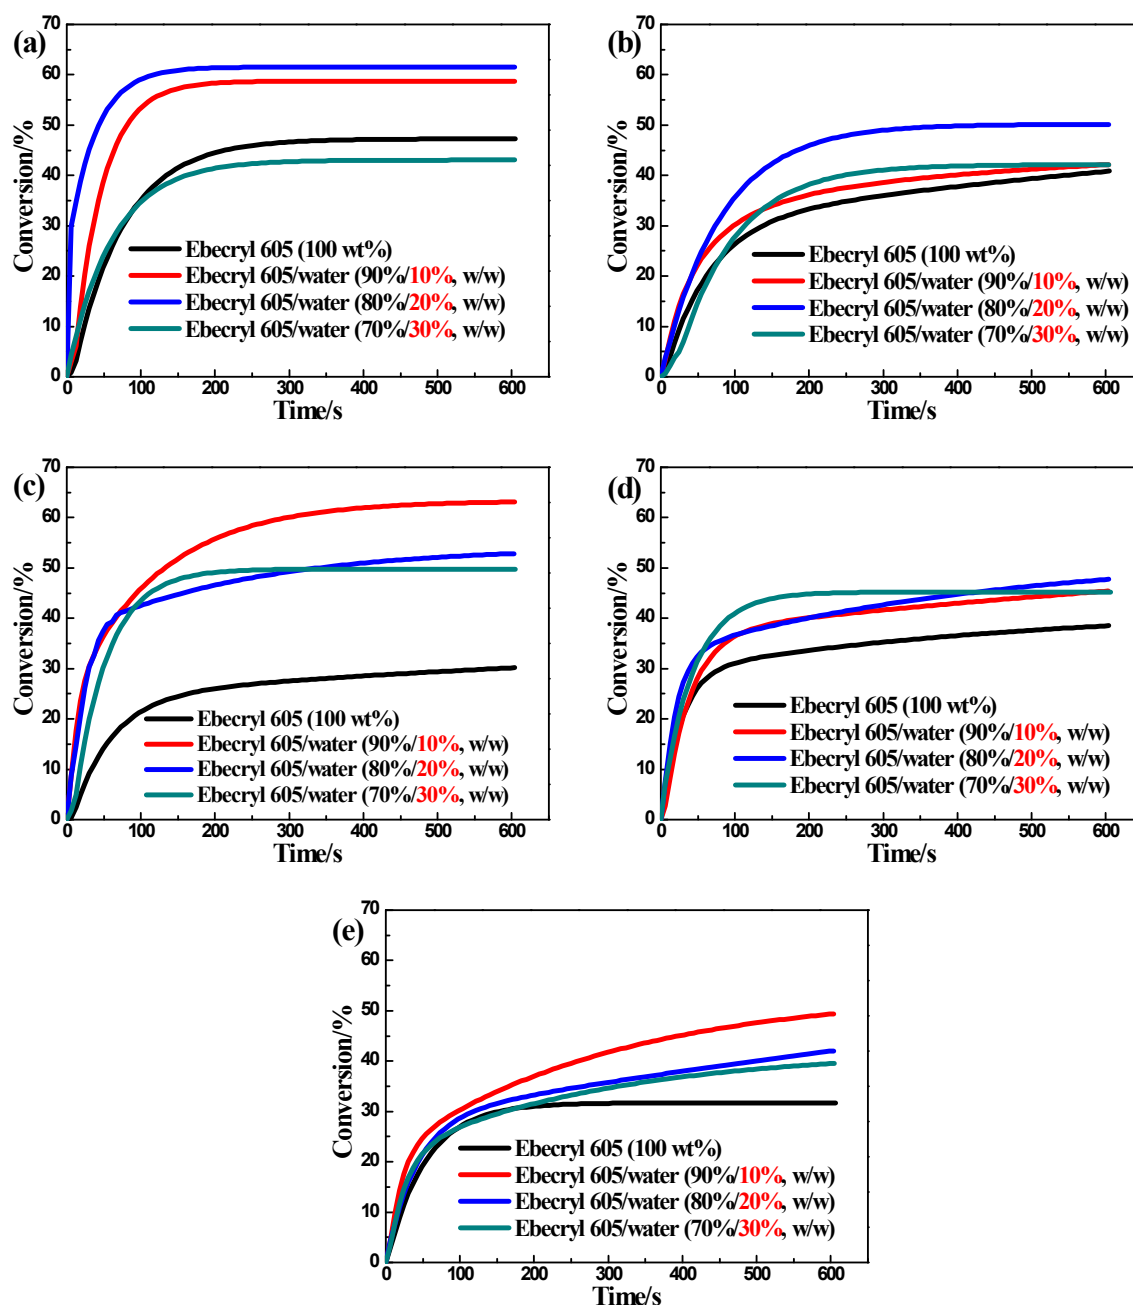

**Figure S2** Photopolymerization profiles (acrylate function conversion vs. time) of Ebecryl 605/water blends with different water contents under air in the presence of (a) TFB/IOD (0.5%/1%, w/w) (b) C 1/IOD (0.1%/1%, w/w) (c) CBUS 450/IOD (2%/2%, w/w) (d) CBS X/IOD (0.1%/1%, w/w) (e) BBT/IOD (1%/2%, w/w) PISs upon LED@420 nm exposure.

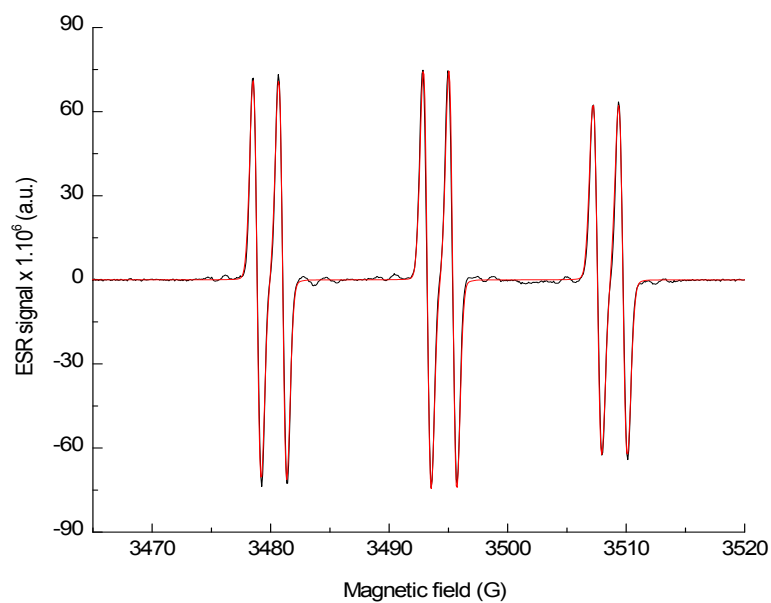

**Figure S3** ESR-ST spectrum of the CBUS 450/IOD system in tert-butylbenzene nitrogen saturated solution after light irradiation at 385 nm. Experimental (-----), simulated (-----).

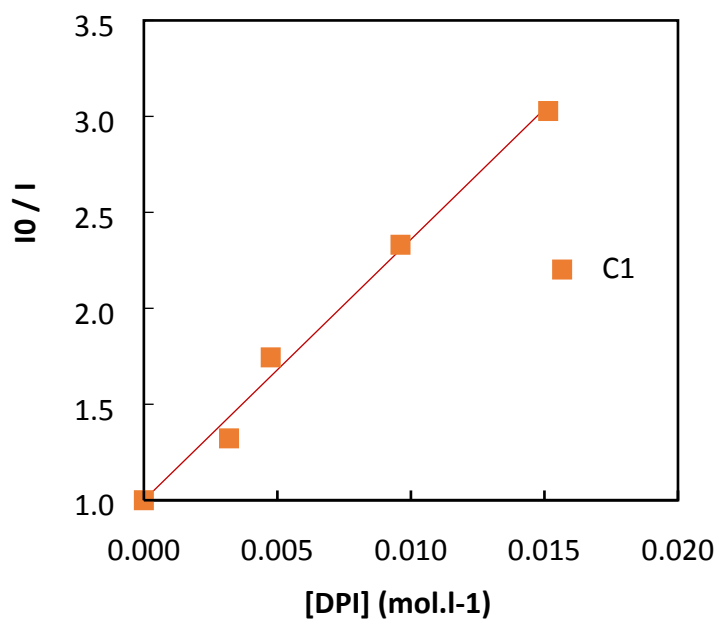

**Figure S4** Stern-Volmer plot for the steady state fluorescence quenching.

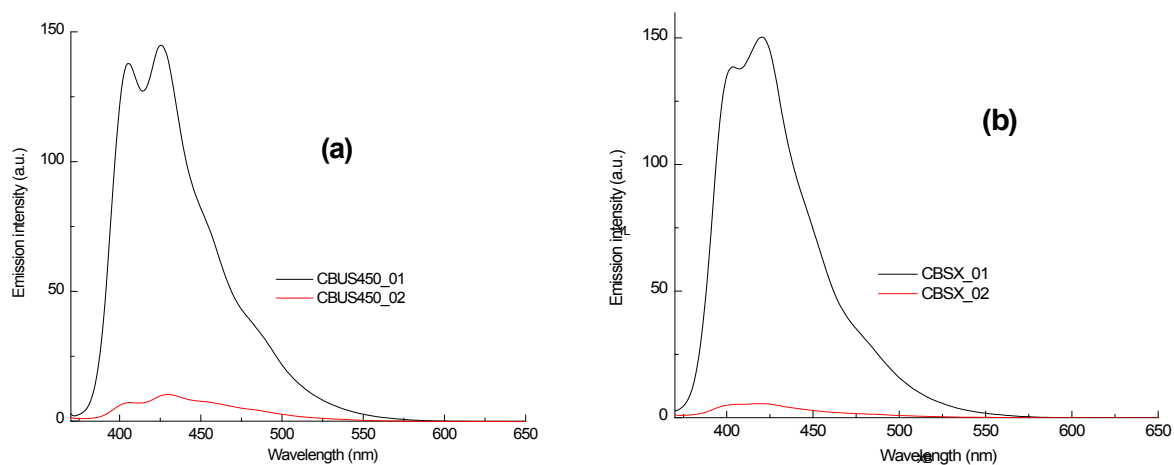

**Figure S5** Steady state fluorescence quenching experiments for a) CBUS450 in absence (----) and in presence (----) of IOD ( $[IOD] = 1.0$  mM), b) CBSX in absence (----) and in presence (---) of IOD ( $[IOD] = 4.3$  mM).

**Table S2.** Hyperfine coupling constants gathered through ESR-ST experiments. LED irradiation centers at 385 nm.

| Compounds          | TFB  | BBT  | C1 <sup>a</sup> | CBUS 450 | CBS X |
|--------------------|------|------|-----------------|----------|-------|
| a <sub>N</sub> (G) | 14.3 | 14.3 | 14.4            | 14.3     | 14.3  |
| a <sub>H</sub> (G) | 2.1  | 2.1  | 2.2             | 2.1      | 2.1   |

<sup>a</sup> Key: confidency upon hfc is  $\pm 0.1$  G.

**Table S3** Final conversion of vinylic bond of HEA in the presence of different PISs obtained from photolysis kinetics varies from 0- to 60-min irradiation and 60-min of LED exposure directly.

| Conversion   | Before irradiation | After 15-min irradiation | After 30-min irradiation | After 45-min irradiation | After 60-min irradiation | 60-min irradiation directly |
|--------------|--------------------|--------------------------|--------------------------|--------------------------|--------------------------|-----------------------------|
| TFB/IOD      | -                  | 63.2%                    | 88.7%                    | 94.4%                    | 97.7%                    | 87.2%                       |
| C 1/IOD      | -                  | 45.7%                    | 82.9%                    | 95.5%                    | 95.5%                    | 88.9%                       |
| CBUS 450/IOD | -                  | 68.1%                    | 90.6%                    | 98.5%                    | 99.6%                    | 93.3%                       |
| CBS X/IOD    | -                  | 56.8%                    | 77.3%                    | 83.7%                    | 85.8%                    | 72.1%                       |
| BBT/IOD      | -                  | 3.7%                     | 13.1%                    | 29.1%                    | 44.3%                    | 42.2%                       |

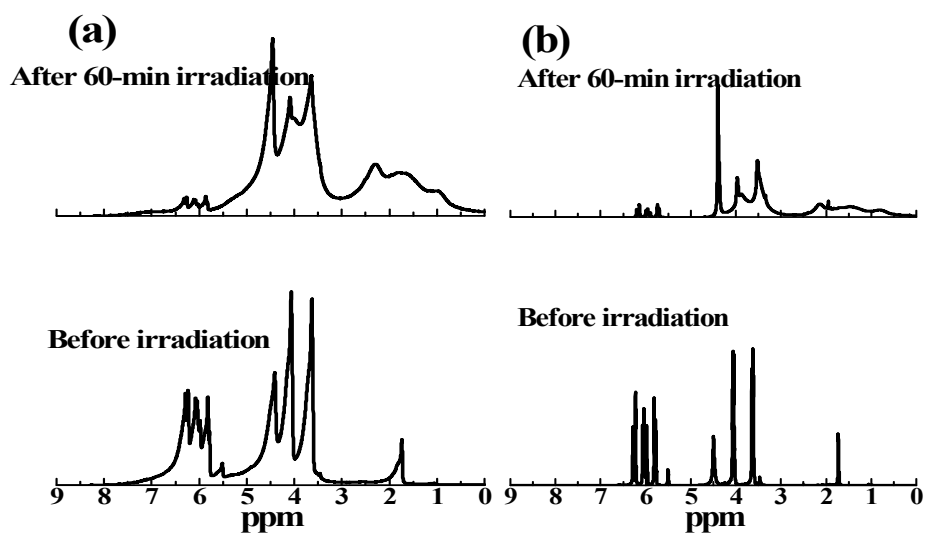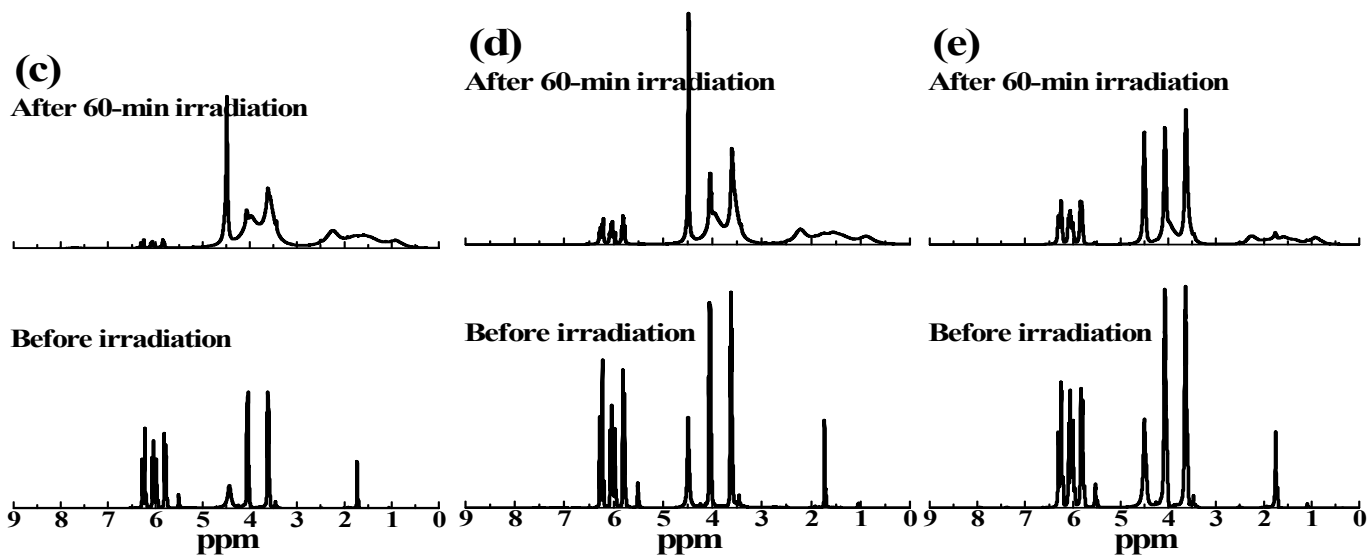



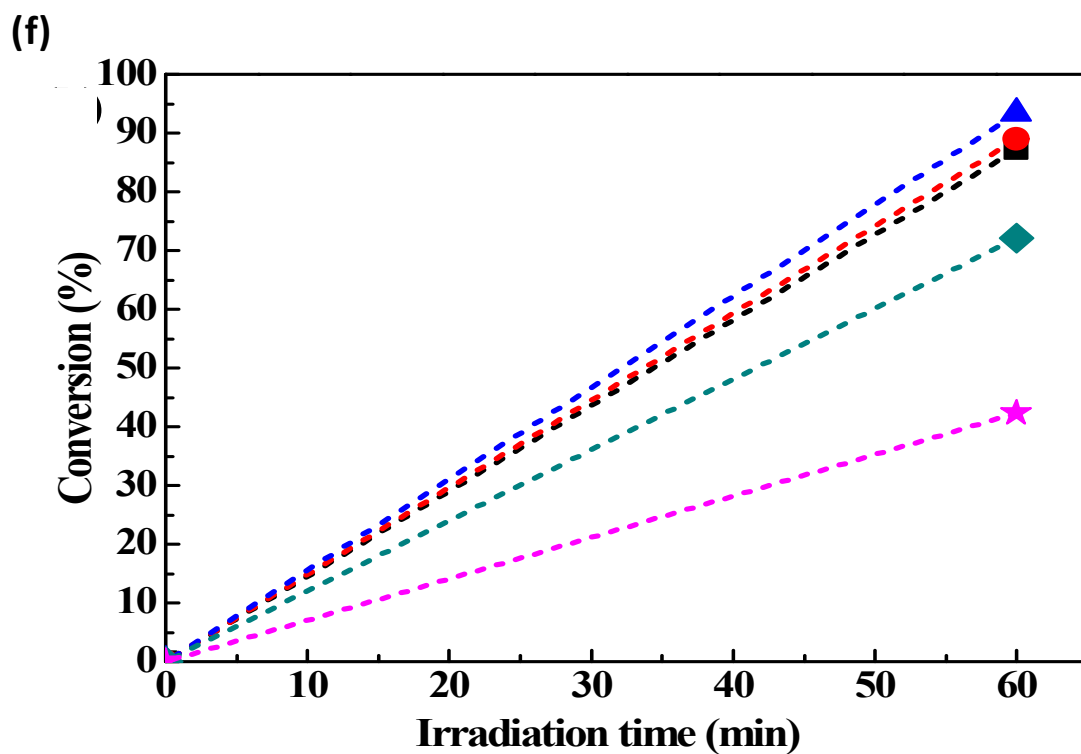

**Figure S6**  $^1\text{H}$  NMR spectra of HEA in a mixed solution (HEA/ $\text{D}_2\text{O}$ / $d$ -DMSO blends ( $[\text{HEA}] = 4.4 \text{ M}$ ;  $[\text{D}_2\text{O}] = 25.5 \text{ M}$ ;  $[d\text{-DMSO}] = 1.1 \text{ M}$ ; the volume ratio of HEA/ $\text{D}_2\text{O} = 1:1$ ) after  $\text{N}_2$ -bubbling before and after 60-min irradiation in the presence of (a) TFB/IOD; (b) C 1/IOD; (c) CBUS 450/IOD; (d) CBS X/IOD PISs; (e) BBT/IOD PISs. (f) Conversion vs. irradiation time. All the tests were carried out at ambient temperature. For all samples,  $[\text{TFB}] = [\text{CBUS 450}] = 2.0 \text{ mM}$ ;  $[\text{C 1}] = 8.0 \text{ mM}$ ;  $[\text{CBS X}] = 3.3 \text{ mM}$ ;  $[\text{BBT}] = 4.3 \text{ mM}$ ;  $[\text{IOD}] = 4.4 \text{ mM}$ .

**Table S4** Final conversion of vinylic bond of HEA with different volume ratios of HEA/D<sub>2</sub>O mixtures without *d*-DMSO in the presence of CBS X/IOD PIS before and after LED exposure.

| The volume ratios of HEA/D <sub>2</sub> O mixtures | Before irradiation | After 15-min irradiation | After 30-min irradiation | After 45-min irradiation | After 60-min irradiation |
|----------------------------------------------------|--------------------|--------------------------|--------------------------|--------------------------|--------------------------|
| 1/5                                                | -                  | 2.2%                     | 5.9%                     | 7.8%                     | 9.3%                     |
| 1/2                                                | -                  | 28.1%                    | 37.8%                    | 45.6%                    | 53.3%                    |
| 1/1                                                | -                  | 53.2%                    | 63.6%                    | 68.8%                    | 69.9%                    |
| 2/1                                                | -                  | 56.7%                    | 72.4%                    | 78.7%                    | 82.5%                    |
| 5/1                                                | -                  | 42.5%                    | 53.4%                    | 67.2%                    | 73.5%                    |
| 11/1                                               | -                  | 40.7%                    | 50.4%                    | 56.4%                    | 64.4%                    |

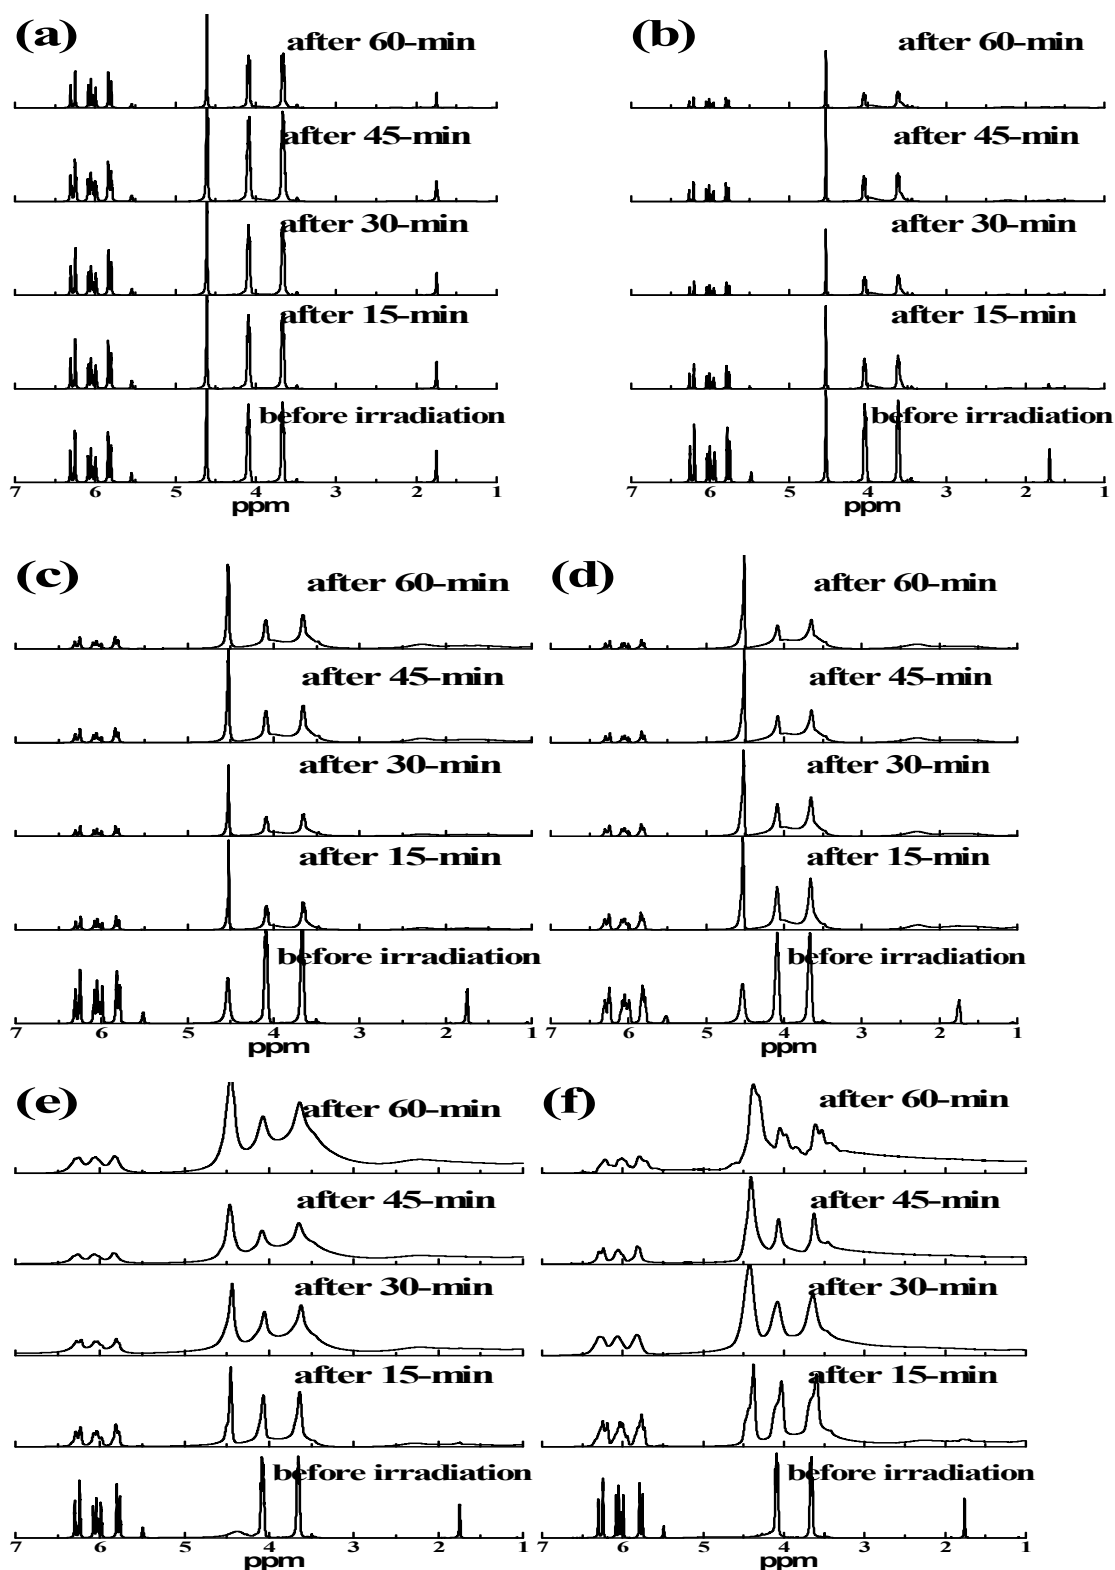

**Figure S7**  $^1\text{H}$  NMR spectra of HEA as a function of different ratios of HEA/D<sub>2</sub>O mixtures without *d*-DMSO after N<sub>2</sub>-bubbling and in the presence of CBS X/IOD PIS before and after LED exposure. The volume ratios of HEA/D<sub>2</sub>O range from (a) 1/5, (b) 1/2, (c) 1/1, (d) 2/1, (e) 5/1 to (f) 11/1. [CBS X] = 3.6 mM; [IOD] = 4.8 mM.
